# Supplementary material
Source: publisher figshare collection journal article supplement (https://gsajournals.figshare.com/articles/dataset/_/12683750)
Supplement: Supplementary file 1 [file 1]

Fig. S1

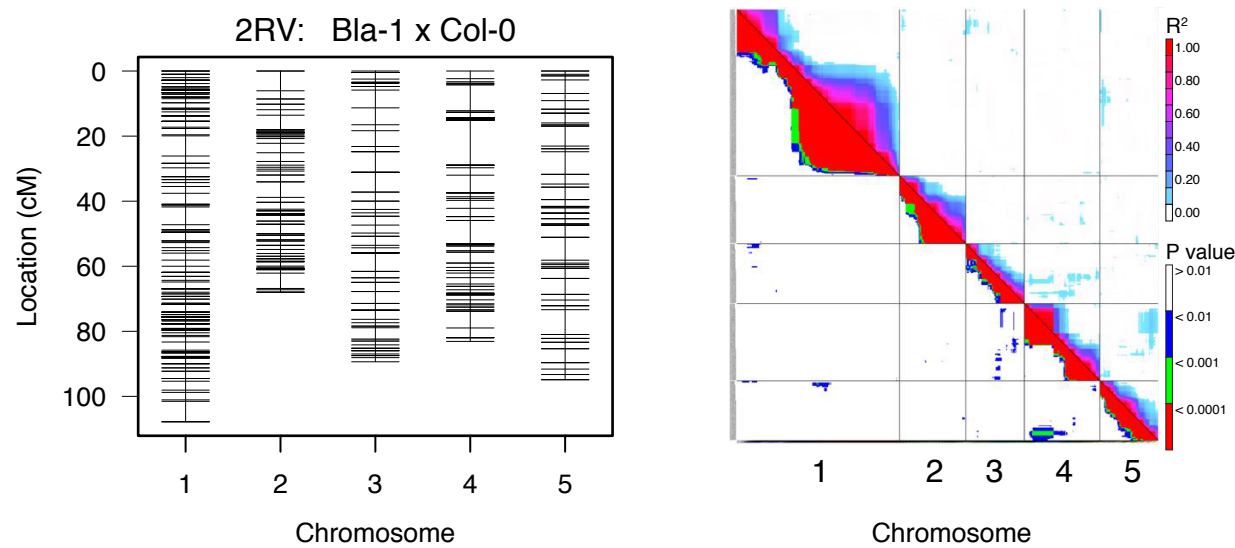

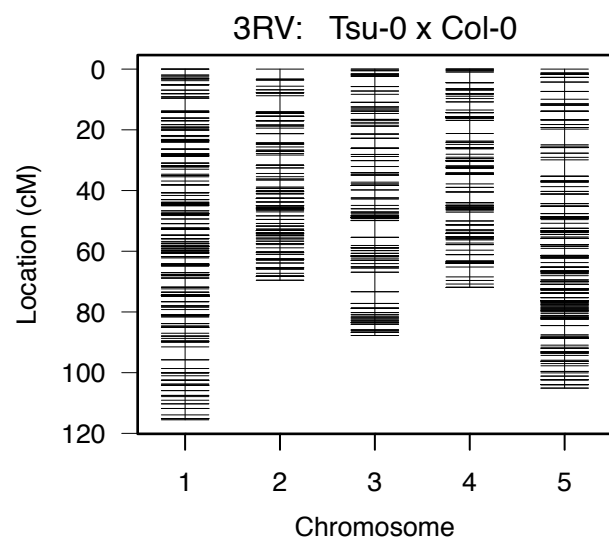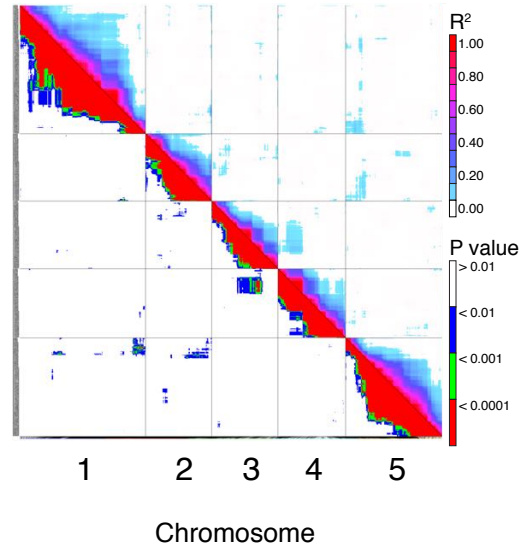

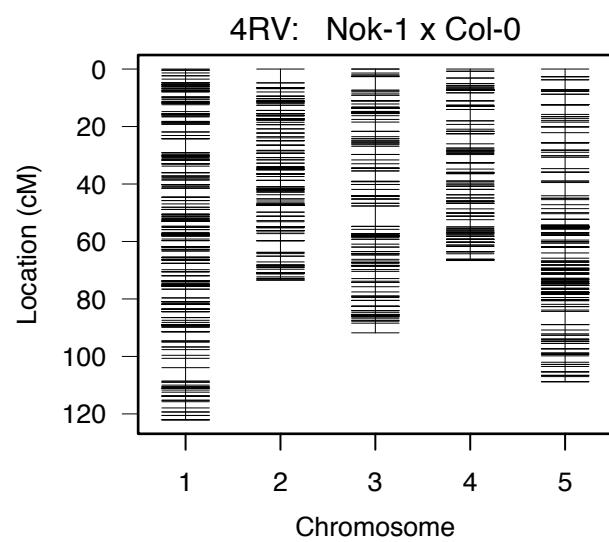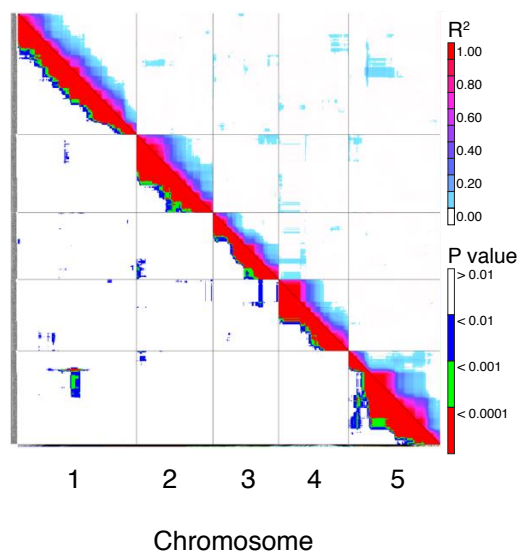

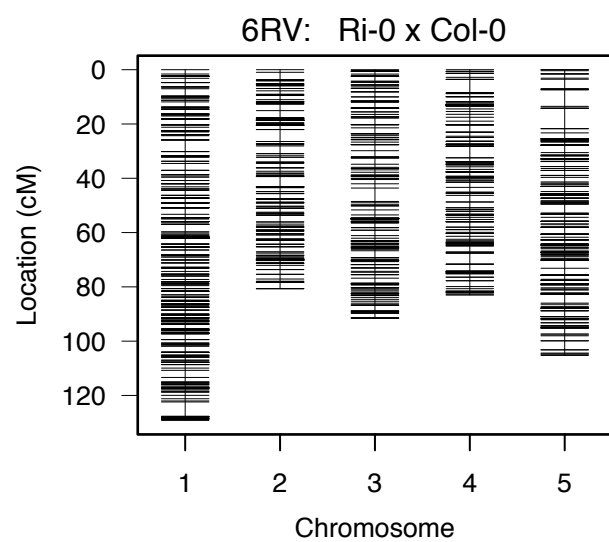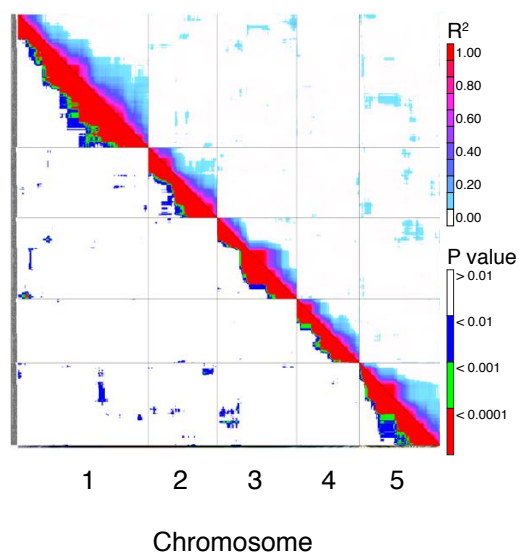

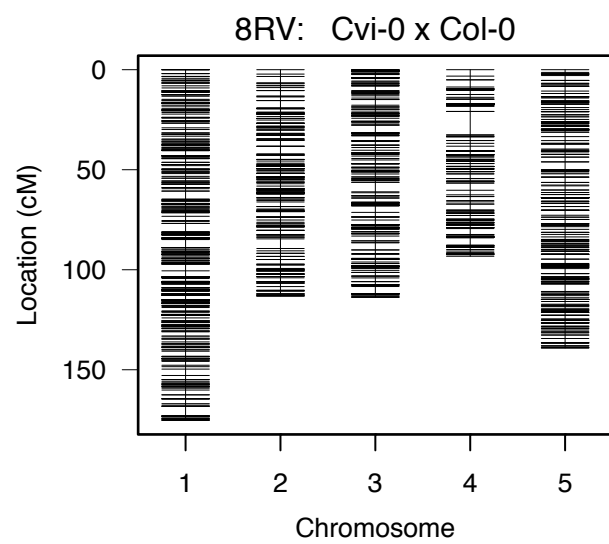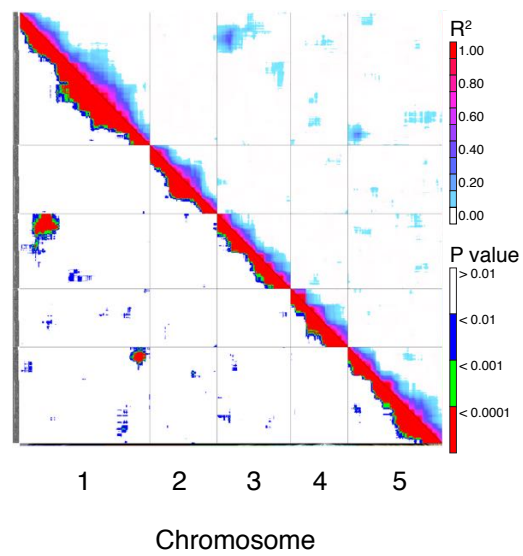

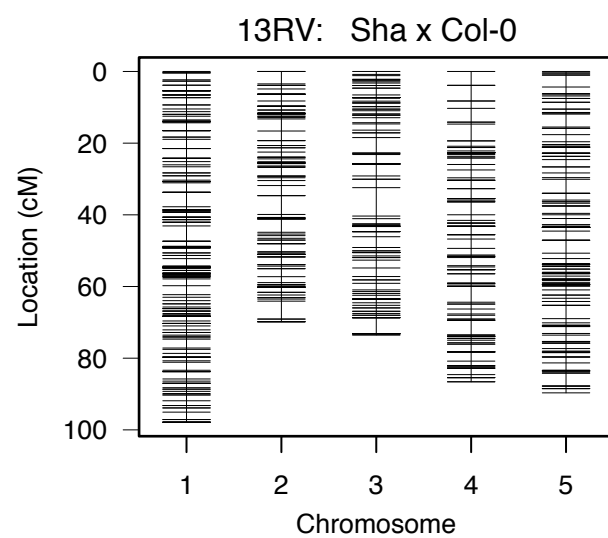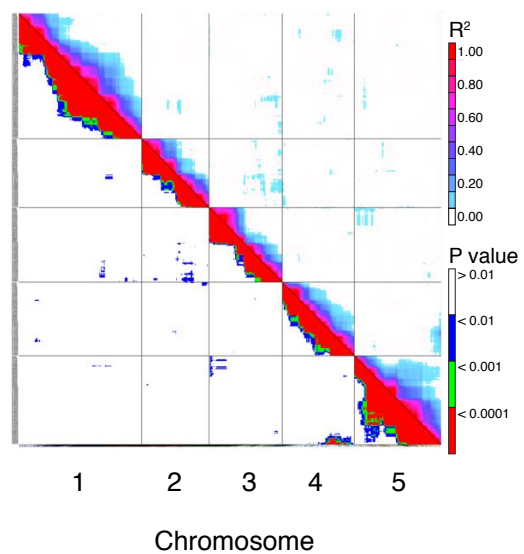

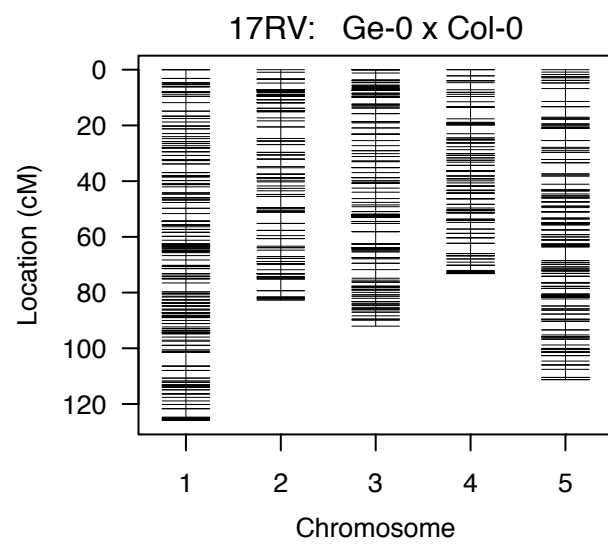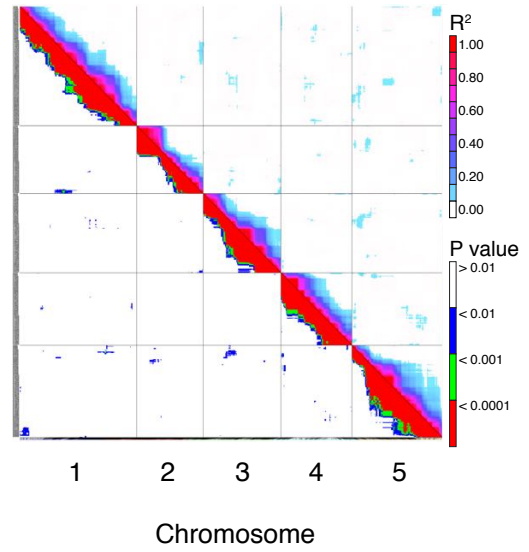

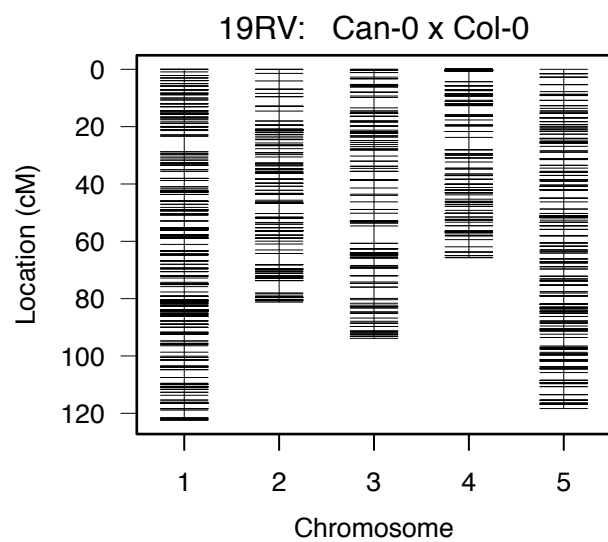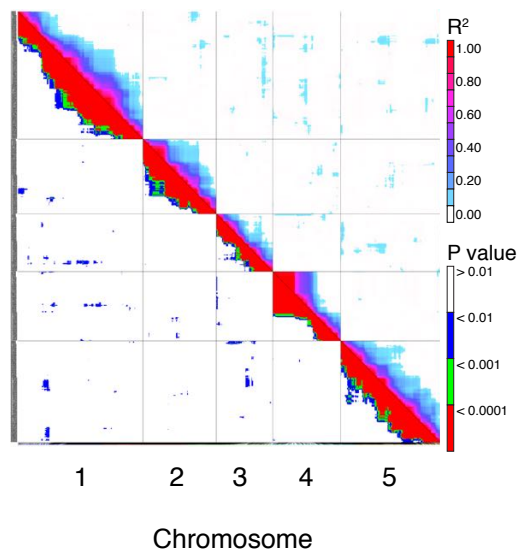



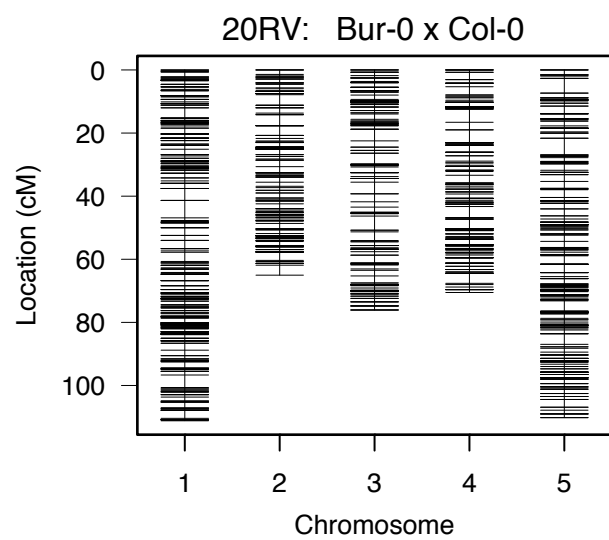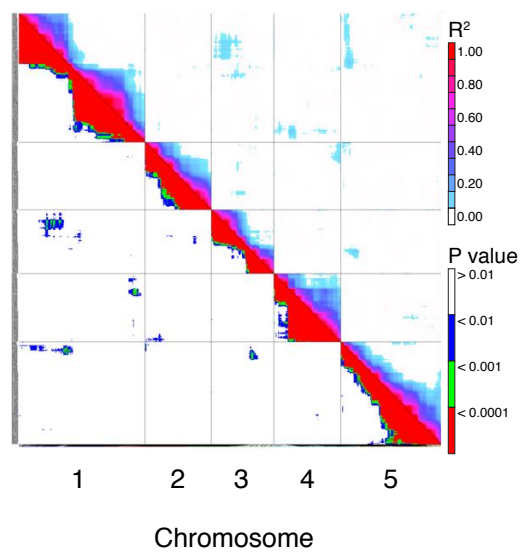

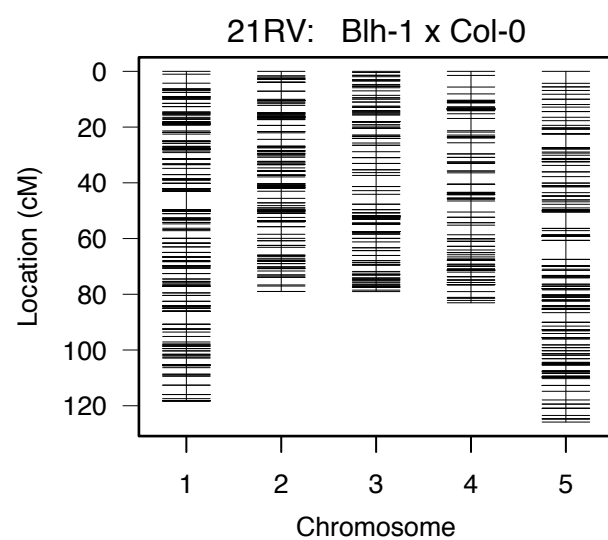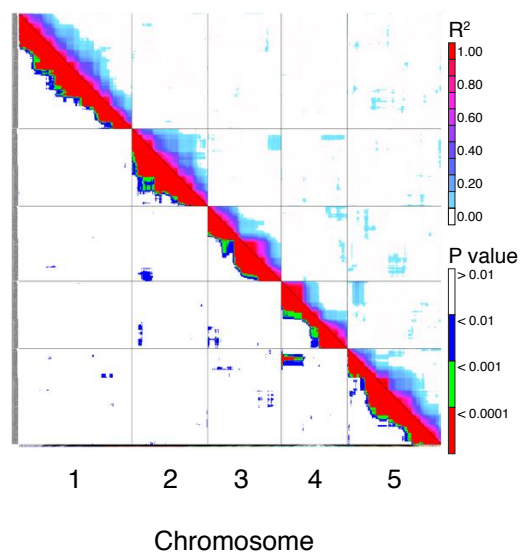

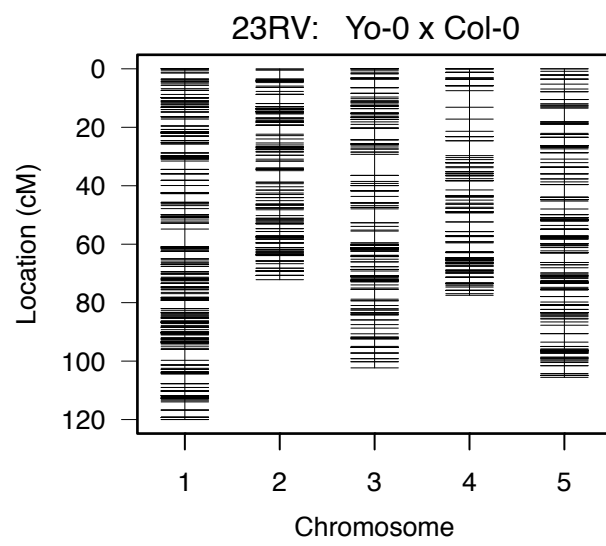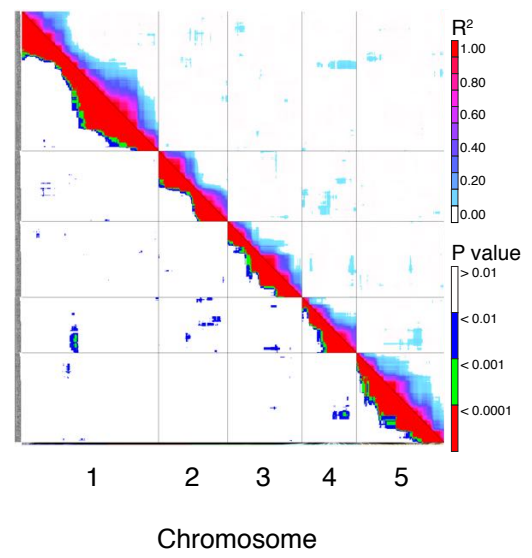

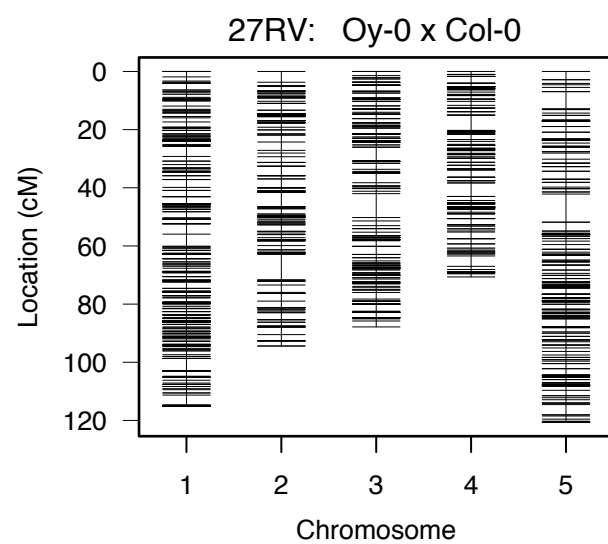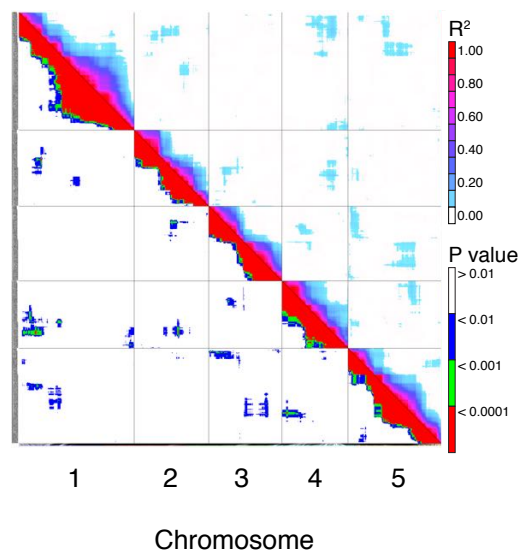

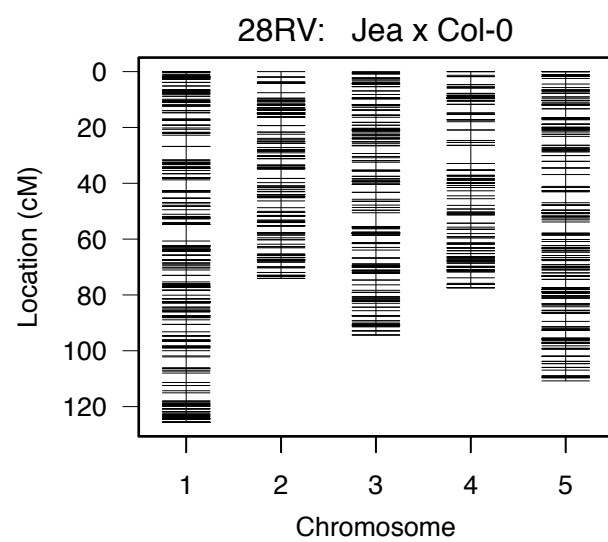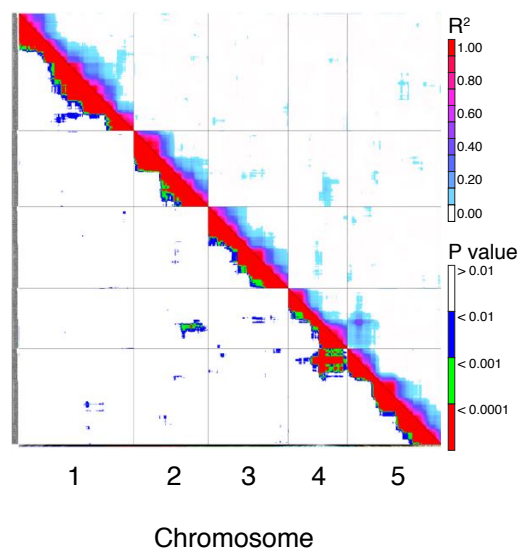

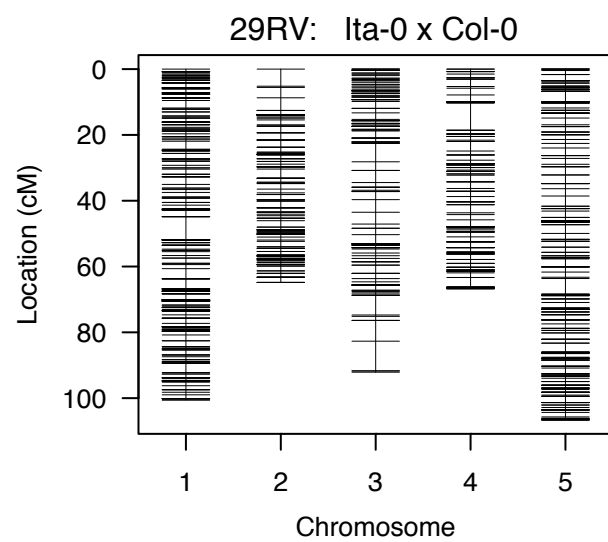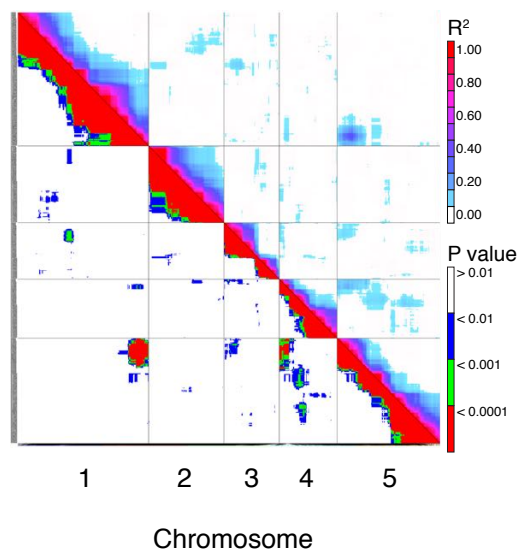

**Fig. S1.** Linkage maps (left) and linkage disequilibrium plots (right) for remaining 13 *Arabidopsis thaliana* RIL populations (population identified top left). Linkage maps were generated using both original INRA and newly identified GBS SNPs (see Figure 1 for remaining population of 14 total RIL sets). Linkage disequilibrium plots of intra- and inter-chromosomal LD as measured by SNP-SNP Pearson product moment correlation coefficients ( $r^2$ ; top right of diagonal) with associated significance tests (p-value; lower left of diagonal). See Table 1 for SNP numbers, interval metrics, and missing data pre- and post-imputations for each population.
