# Supplementary material
Source: publisher figshare collection journal article supplement (https://gsajournals.figshare.com/articles/dataset/_/12683750)
Supplement: Supplementary file 1 [file 1]

## Sheet: Table_S1
Table S1--custom oliogonucleotide adapters
Primer	Sequence
ILL_HindIII_1	5’ GCAGAAGACGGCATACGAGCTCTTCCGATCTG
ILL_HindIII_2	5’ AGCTCAGATCGGAAGAGCTCGTATGCCGTCTTCTGCTTG
Oligonucleotide sequences for custom adapters that are described in the methods.
