# Supplementary material
Source: publisher figshare collection journal article supplement (https://gsajournals.figshare.com/articles/dataset/_/12683750)
Supplement: Supplementary file 2 [file 1]

Fig. S2

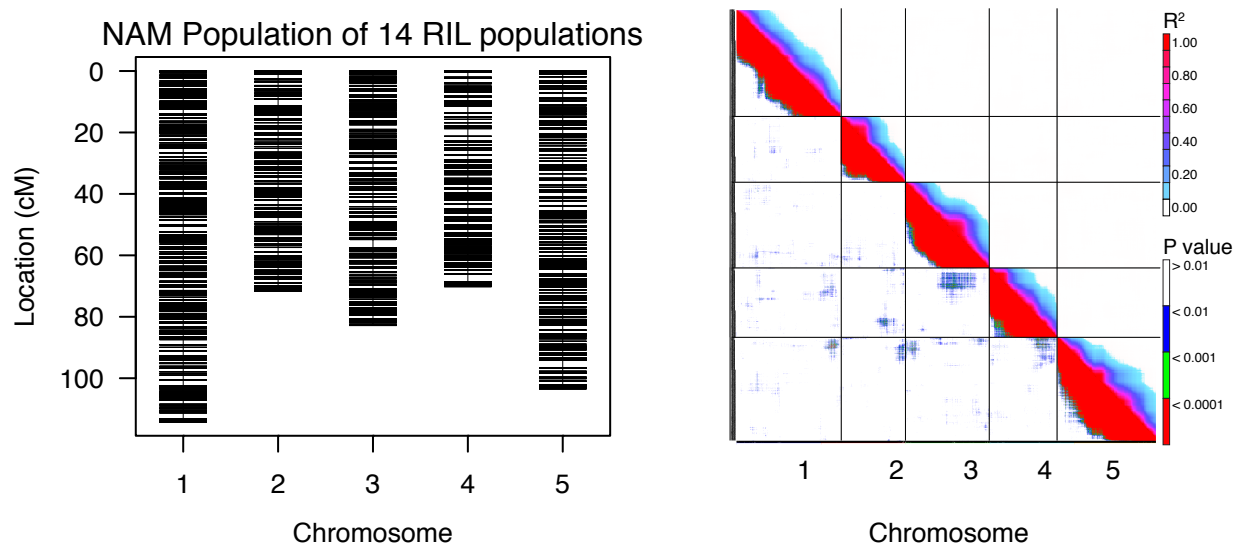

**Fig. S2.** Joint-linkage map (left) and linkage disequilibrium plot (right) for *Arabidopsis thaliana* NAM population comprised of 14 RIL sets that share a common recurrent parent (Col-0). Linkage maps were generated using imputed SNPs where at least 11 of the 14 non-recurrent parents share a common allele. Linkage disequilibrium plots of intra- and inter-chromosomal LD as measured by SNP-SNP Pearson product moment correlation coefficients ( $r^2$ ; top right of diagonal) with associated significance tests (p-value; lower left of diagonal).
